# Supplementary material for: Synthesis, characterization and applications of selenocysteine-responsive nanoprobe based on dinitrobenzene sulfonyl-modified poly(carbonate) micelles
Source: Royal Society of Chemistry journal article supplement (doi:10.1039/c5ra12314c), 2015-01-01

Supporting information for

Synthesis, Characterization and Applications of  
Selenocysteine Responsive Nanoprobe Based on  
Dinitrobenzene Sulfonyl-modified Poly(carbonate)s  
Micelles

Yanxia Nan<sup>a,†</sup>, Wenjie Zhao<sup>a,†</sup>, Xinhua Xu<sup>a,\*</sup>, Chak-Tong Au<sup>a</sup>, Renhua Qiu<sup>a,\*</sup>

State Key Laboratory of Chemo/Biosensing and Chemometrics, College of Chemistry  
and Chemical Engineering, Hunan University, Changsha, 410082, China.

\*To whom correspondence should be addressed:

*E-mail:* renhuaqiu@hnu.edu.cn

xhx1581@hnu.edu.cn

Fax: +86-731-8882 1581

# Contents

|                                               |    |
|-----------------------------------------------|----|
| Figure S1 .....                               | S3 |
| Table S1 .....                                | S3 |
| Figure S2 .....                               | S4 |
| Figure S3 .....                               | S4 |
| Figure S4 .....                               | S5 |
| Figure S5 .....                               | S5 |
| Figure S6 .....                               | S6 |
| Figure S7 .....                               | S6 |
| Figure S8 .....                               | S7 |
| $^1\text{H}$ NMR and $^{13}\text{C}$ NMR..... | S8 |

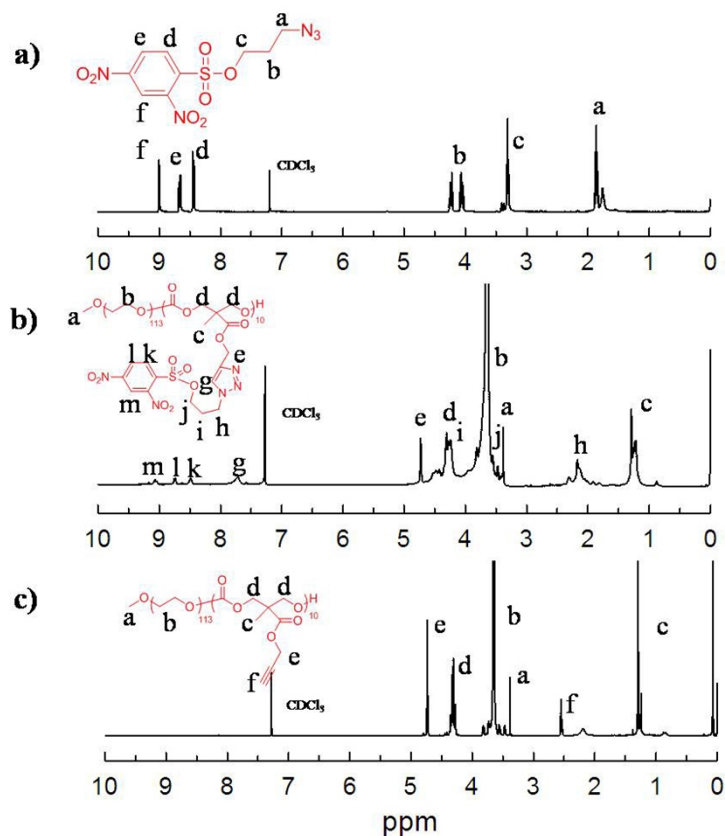

**Figure S1**  $^1\text{H}$  NMR spectra of (a) Dns- $\text{N}_3$ , (b) PMPC-Dns and (c) PEG-*b*-poly(MPC).

| Entry                    | $M_w/M_n^a$ | $M_{n,\text{GPC}}^a$ | $M_{n,\text{NMR}}^b$ | CMC <sup>c</sup> (mg mL <sup>-1</sup> ) |
|--------------------------|-------------|----------------------|----------------------|-----------------------------------------|
| PEG- <i>b</i> -poly(MPC) | 1.0483      | 7263                 | 6984                 | 0.01159                                 |
| PMPC-Dns                 | 1.0756      | 11353                | 10293                | 0.01245                                 |

<sup>a</sup> Both molecular weight ( $M_{n,\text{GPC}}$ ) and the polydispersity ( $M_w/M_n$ ) of the amphiphiles were determined by GPC. <sup>b</sup> $M_{n,\text{NMR}}$  was determined by  $^1\text{H}$  NMR. <sup>c</sup> CMC: the critical micelle concentration of the amphiphiles was determined by fluorescence spectroscopy (Figure S3).

**Table S1** Molecular characteristics of amphiphiles PEG-*b*-poly(MPC) and PMPC-Dns

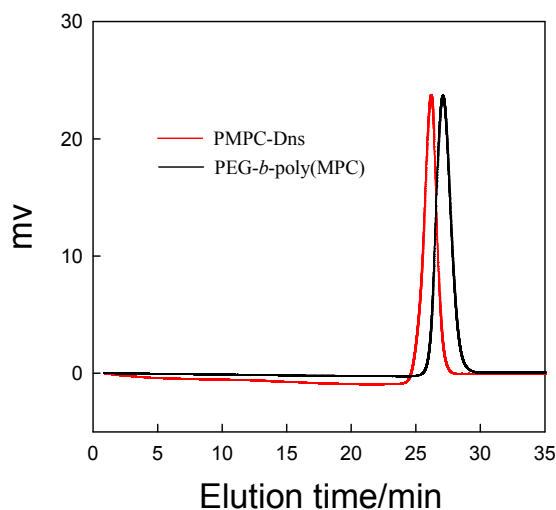

**Figure S2** GPC traces of PEG-*b*-poly(MPC) (black line) and PMPC-Dns (red line)

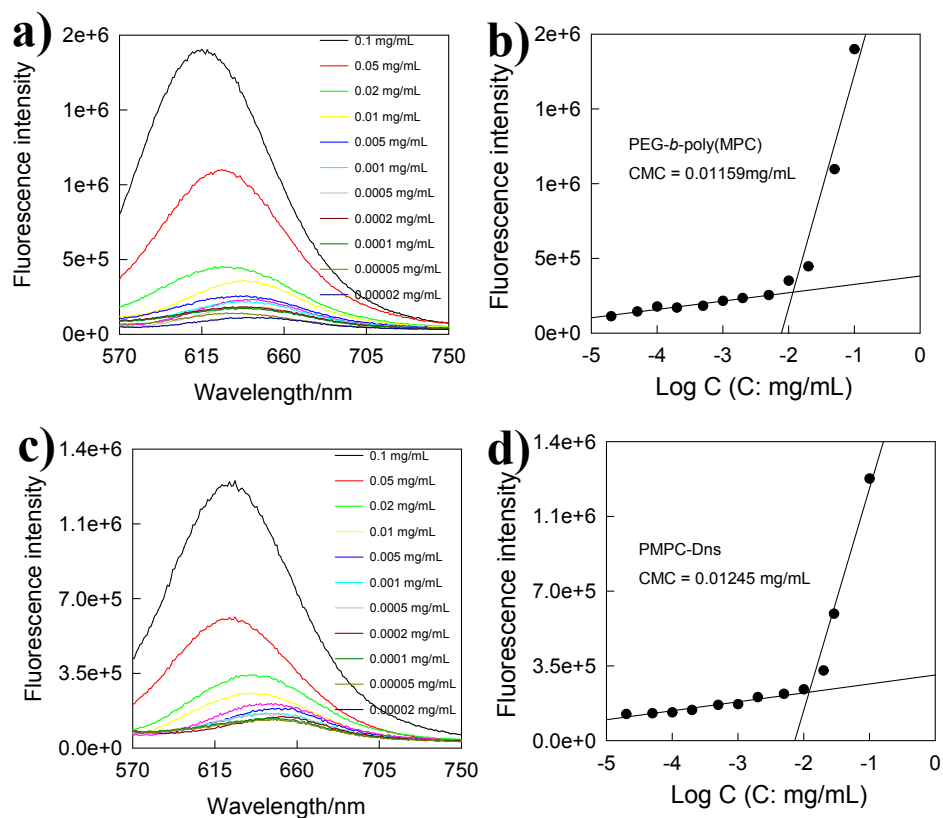

**Figure S3** Fluorescence emission spectra of Nile Red in (a) PEG-*b*-poly(MPC) micelles and (c) PMPC-Dns micelles of varying concentrations, and the relevant emission intensity at 630 nm versus the log of concentration for (b) PEG-*b*-poly(MPC) micelles and (d) PMPC-Dns micelles.

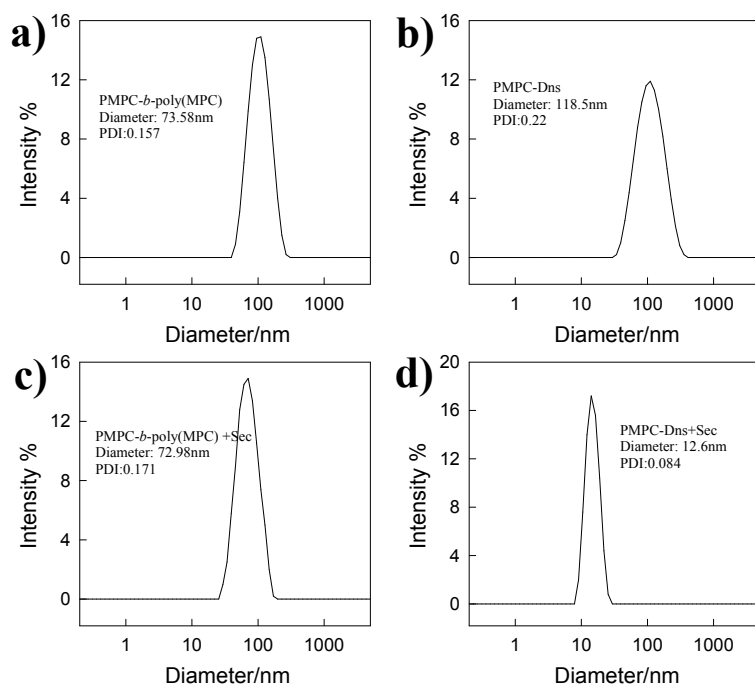

**Figure S4** Mean size distributions of the micelles determined by DLS: (a) PEG-*b*-poly(MPC), (b) PMPC-Dns, (c) PEG-*b*-poly(MPC) treated with Sec, and (d) PMPC-Dns after being treated with Sec for 60 min.

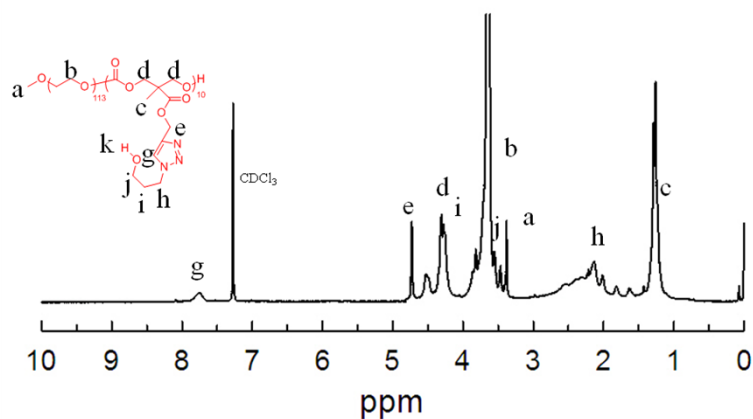

**Figure S5**  $^1\text{H}$  NMR of PMPC-Dns micelles ( $0.5 \text{ mg mL}^{-1}$ ) treated with Sec ( $0.5 \text{ mM}$ ). (The product was allowed to dialyze in aqueous solution and lyophilize for  $^1\text{H}$  NMR detection.)

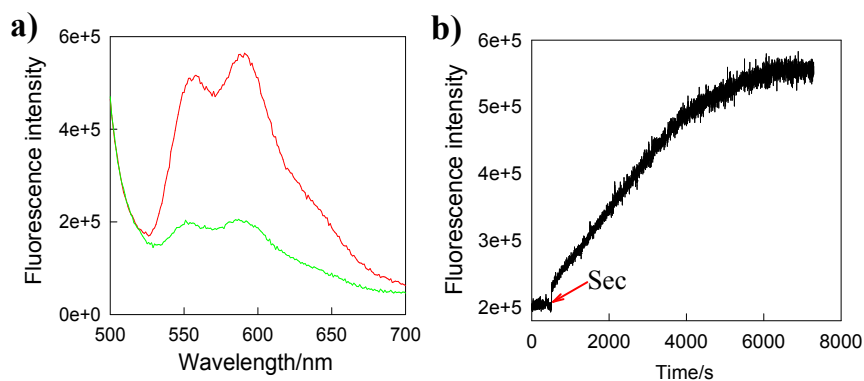

**Figure S6** (a) Fluorescence spectra of PMPC-Dns micelle ( $0.5\text{mg mL}^{-1}$ ) in PBS solution ( $\text{pH} = 7.4$ ,  $20\text{ mM}$ ): free PMPC-Dns micelle (green) and that treated with Sec  $1\mu\text{M}$  for 90 min (red). (b) Time history of the PMPC-Dns micelle responses to Sec in terms of fluorescence intensity. (Fluorescence intensity was recorded at 595 nm with an excitation of 490 nm in wavelength.)

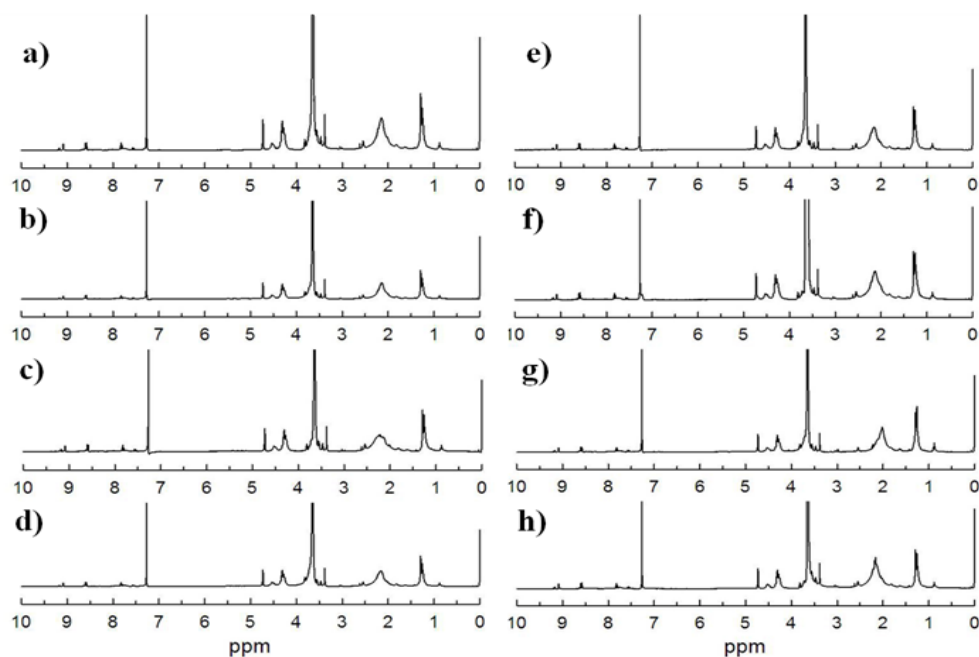

**Figure S7** PMPC-Dns micelle ( $0.5\text{mg mL}^{-1}$ ) responses to various thiols and other sulfur compounds as confirmed by  $^1\text{H}$  NMR. PMPC-Dns micelles treated with  $1\mu\text{M}$  a) DTT, b) NAC, c) Vitamin C, d)  $\text{H}_2\text{S}$ , e) Cys, f) GSH, g)  $\text{Na}_2\text{SeO}_3$  and h) NAC for 90 min. The product was purified by means of dialysis against deionised water that was renewed regularly (dialysis tubing 3500 MWCO, for three days).

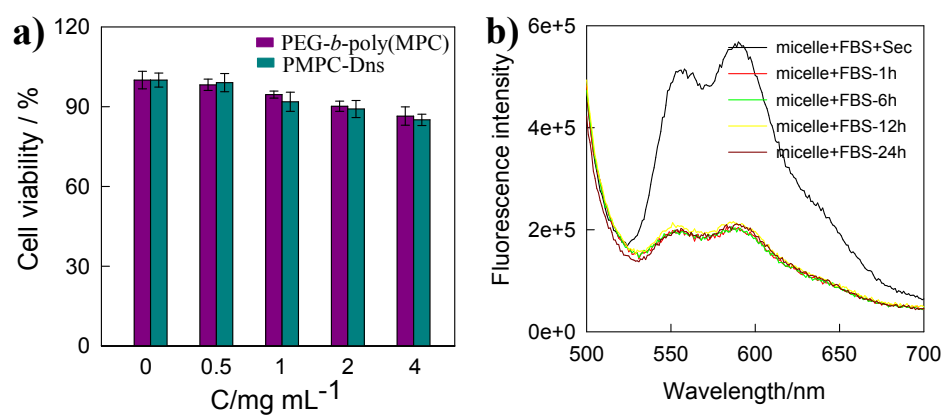

**Figure S8(a)** Cell viability of HeLa cells after 48 h exposure to different concentrations of PMPC-Dns and PEG-*b*-poly(MPC) at 37°C. **(b)** PMPC-Dns micelles treated with high concentrations of bovine serum albumin in the absence of Sec.

# $^1\text{H}$ NMR and $^{13}\text{C}$ NMR

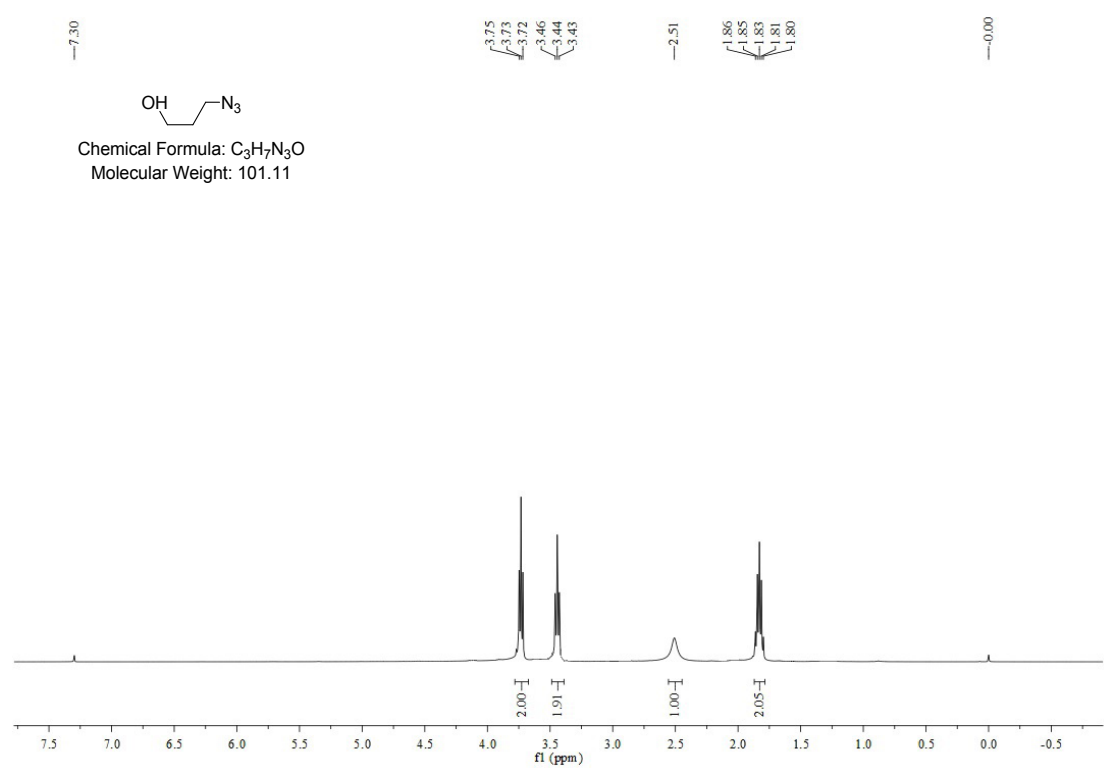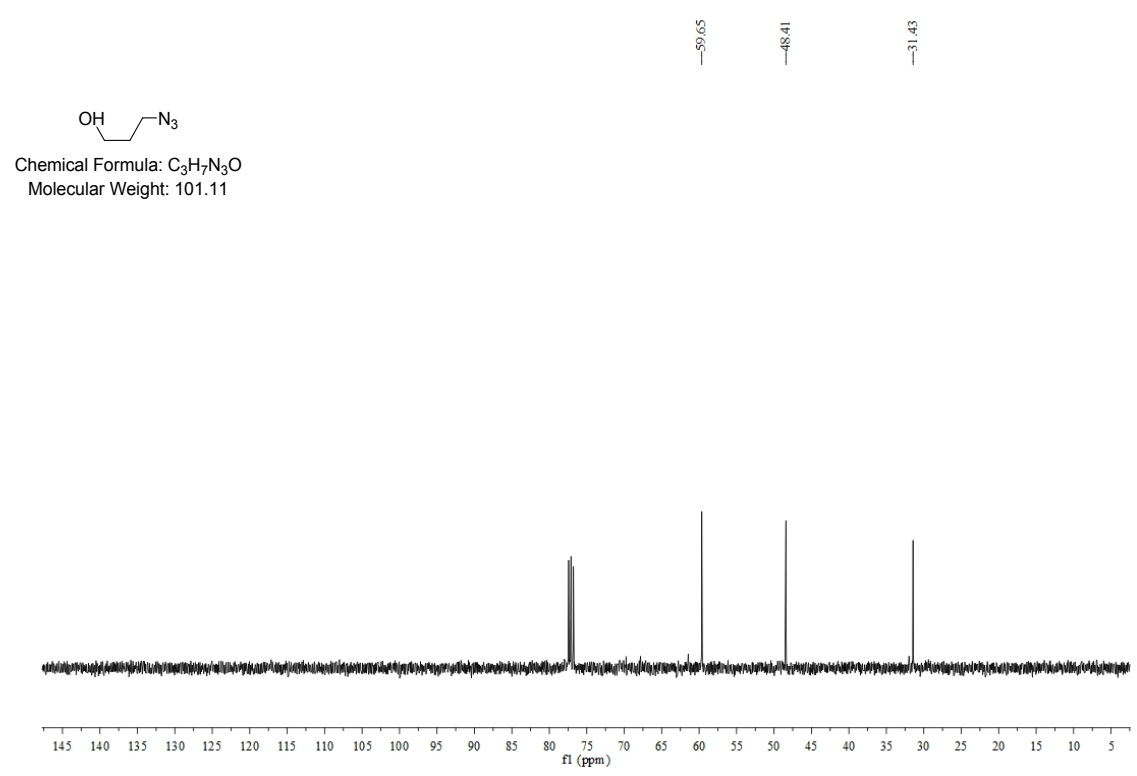



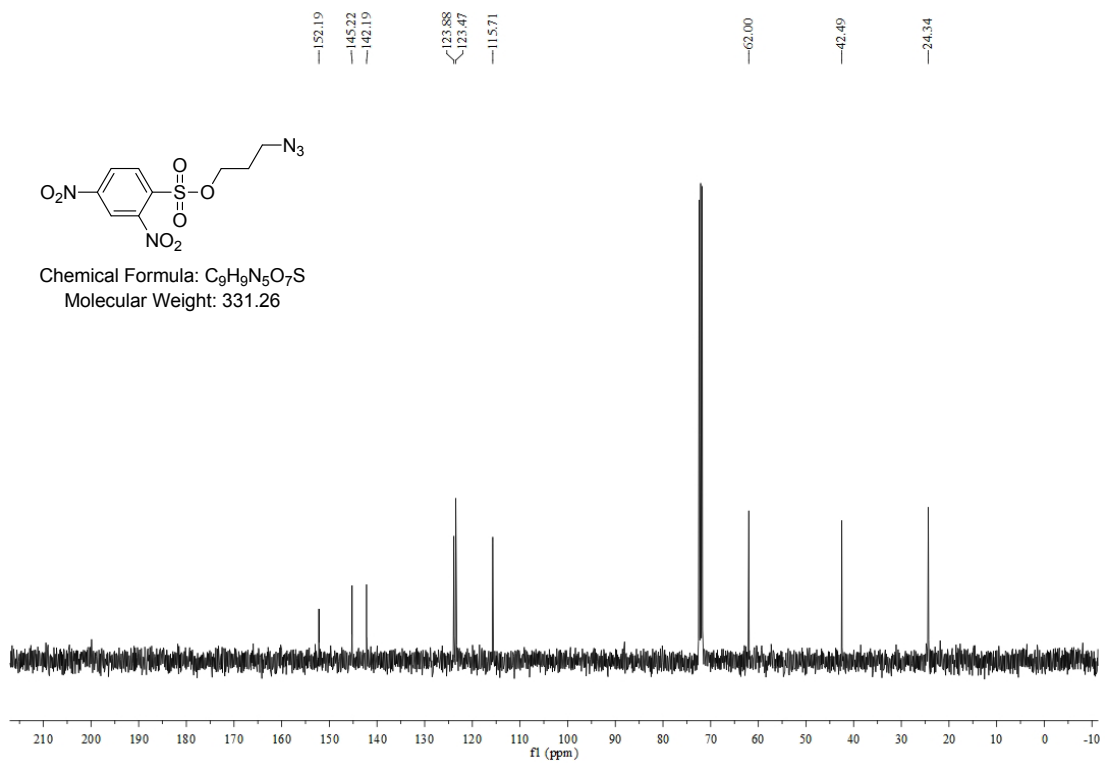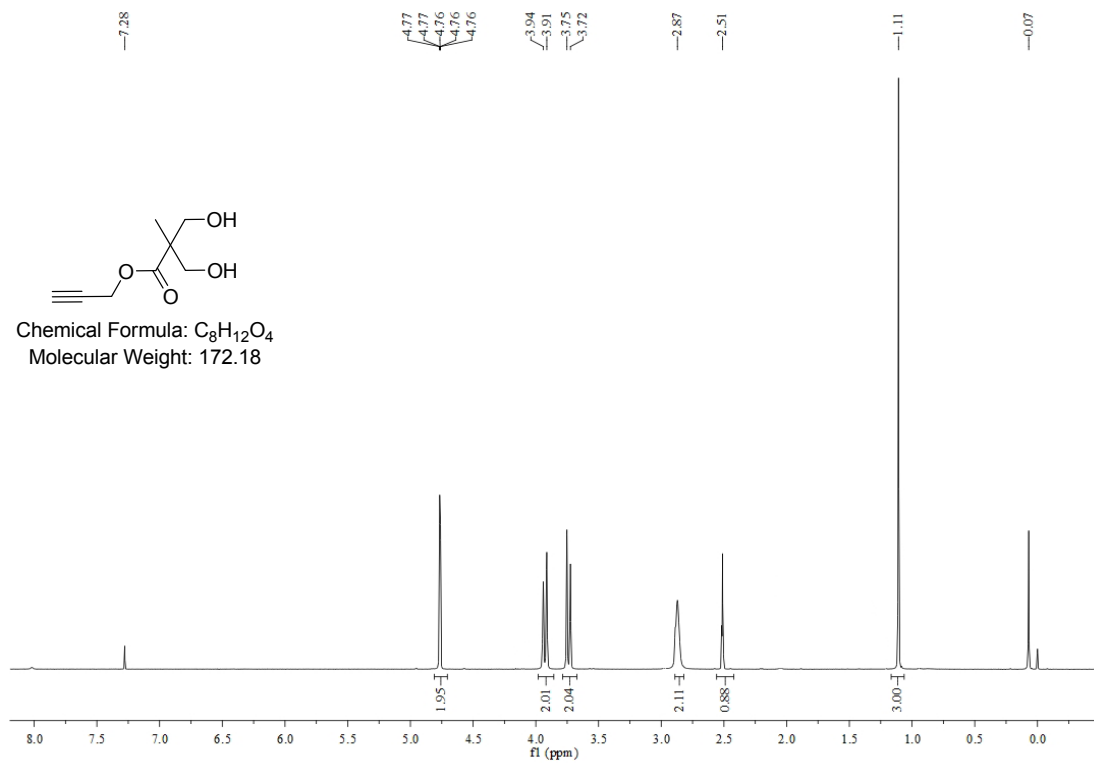

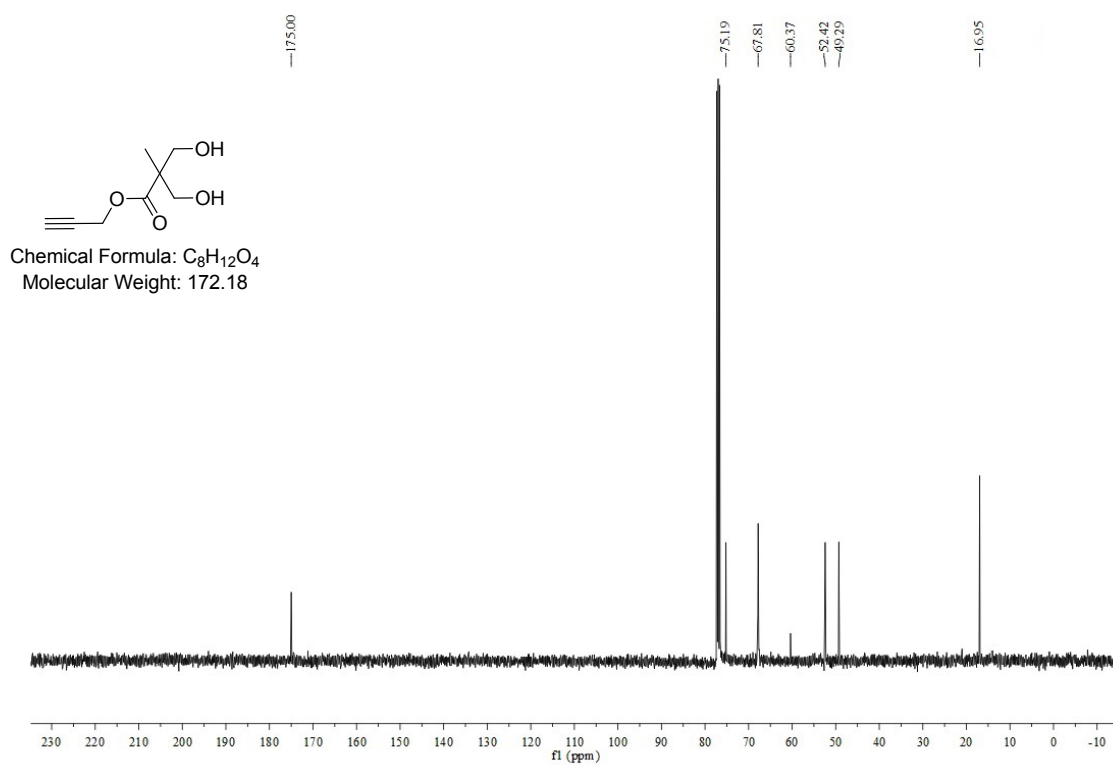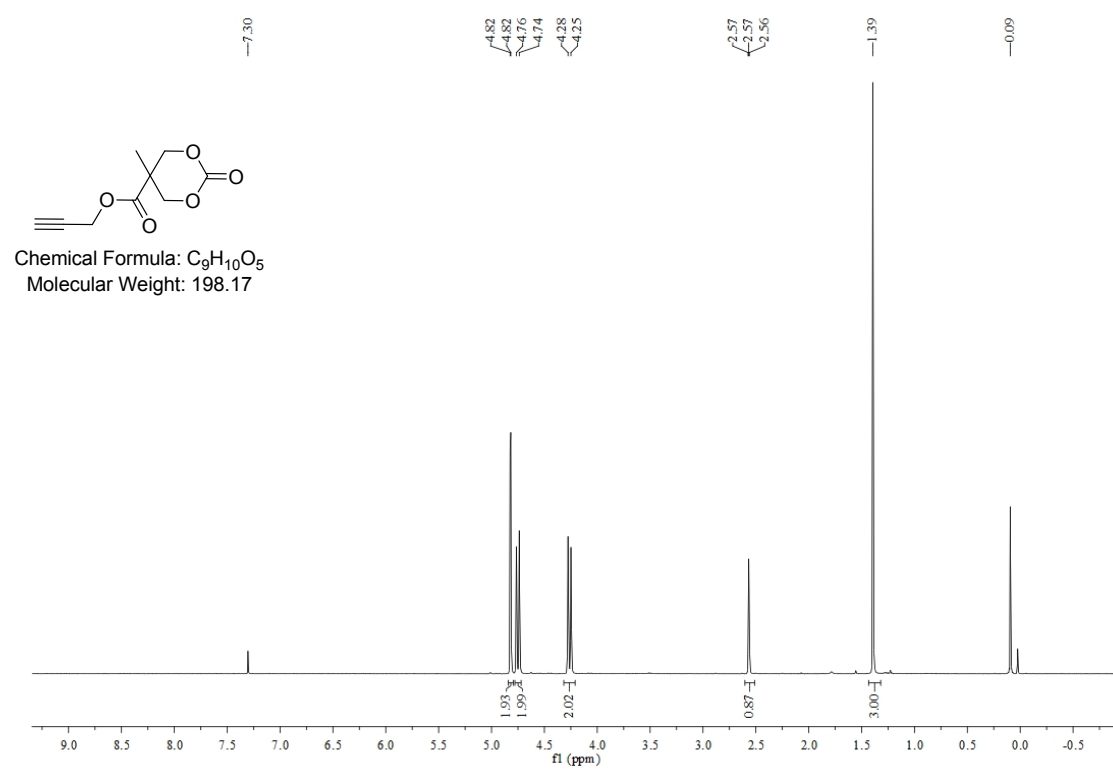

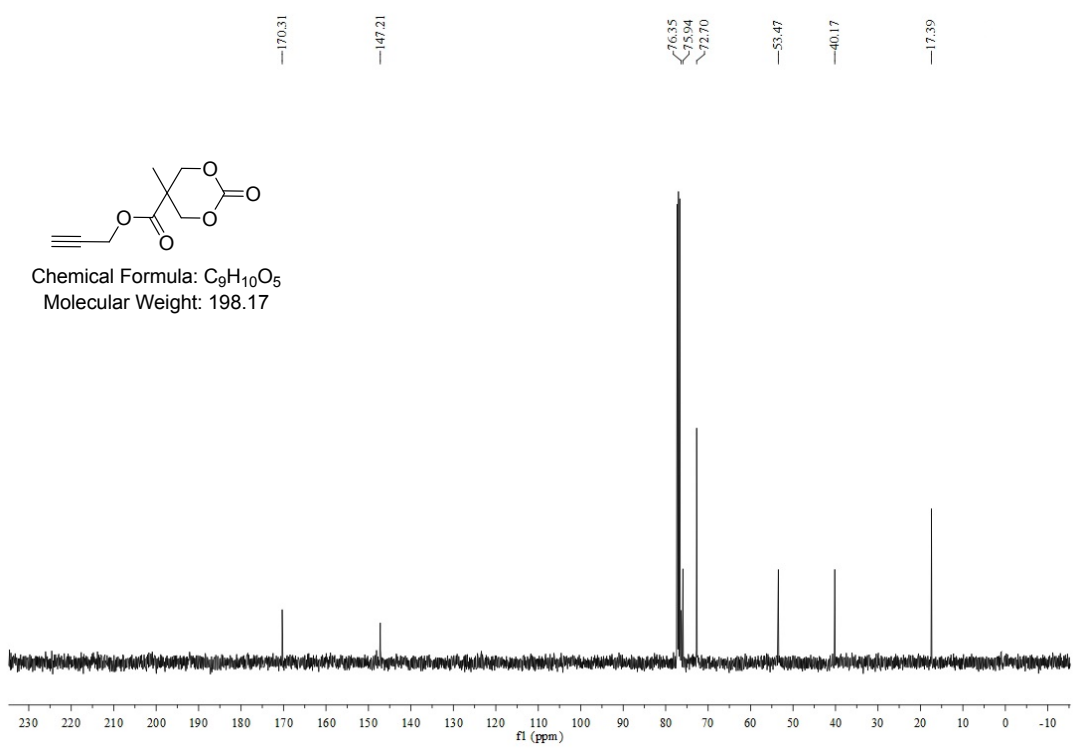

Supplement: c5ra12314c1.pdf [file c5ra12314c1.pdf]
